# Supplementary material for: A bistable electrochromic material based on a hysteretic molecular switch immobilised on nanoparticulate metal oxide
Source: Royal Society of Chemistry journal article supplement (doi:10.1039/b810768h), 2008-01-01
Supplement: b810768h.pdf [file b810768h.pdf]

## Supporting information

# A bistable electrochromic material based on a hysteretic molecular switch immobilised on nanoparticulate metal oxide

George Tsekouras, Nikolas Minder, Egbert Figgemeier, Olof Johansson, and Reiner Lomoth\*

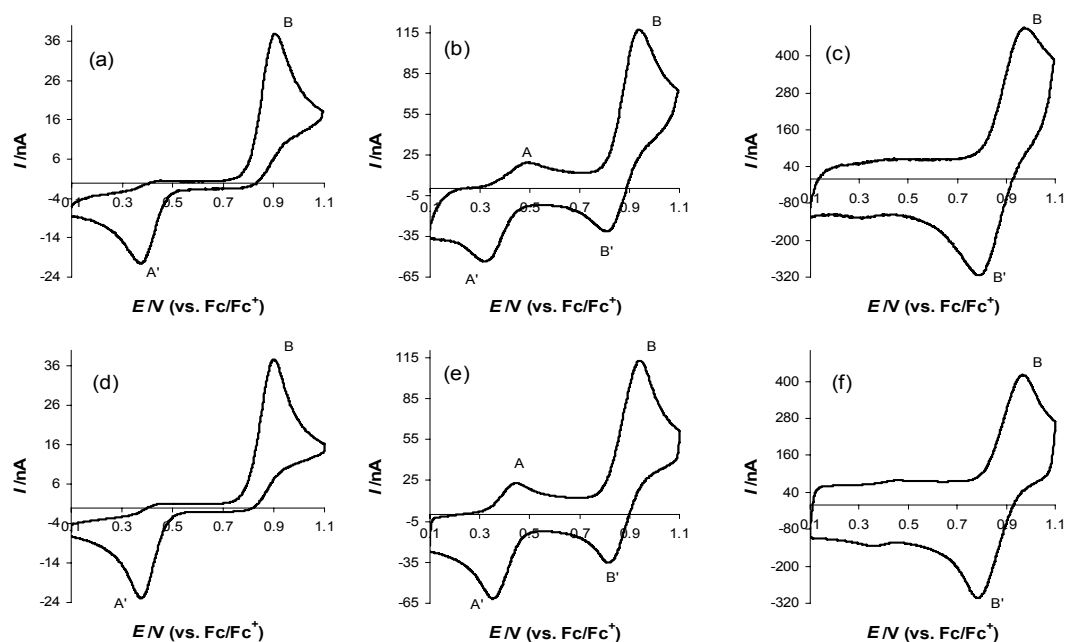

**Fig. S1** CV of **2** in acetonitrile solution (2<sup>nd</sup> scan) recorded at scan rates of 10, 100 and 1000 V s<sup>-1</sup> (a-c) and the corresponding digital simulations (d-f) with the parameters from Scheme 2 and  $K_1 (= k_1/k_{-1}) = 7 \times 10^1$ ,  $K_2 (= k_2/k_{-2}) = 8.5 \times 10^5$ .

**Table S1**  $I_{B'}/I_{A'}$  ratios calculated from baseline corrected values for  $I_{B'}$  and  $I_{A'}$  from the CV of **2**-modified Sb:SnO<sub>2</sub>-coated FTO glass over a range of scan rates.

| $v$ [V s <sup>-1</sup> ] | 0.01 | 0.02 | 0.05 | 0.10 | 0.20 |
|--------------------------|------|------|------|------|------|
| $I_{B'}/I_{A'}$          | 0.90 | 0.93 | 0.86 | 0.85 | 0.88 |
